# Supplementary material
Source: PubMed Central journal article supplement (PMC4034217)
Supplement: 1323666111_pnas.201323666SI.pdf [file 1323666111_pnas.201323666SI.pdf]

# Supporting Information

Reyes-Centeno et al. 10.1073/pnas.1323666111

## The “Negrito” Hypothesis

The ethnographic term “Negrito” broadly refers to Southeast Asian populations exhibiting a phenotype of short stature, dark skin color, and tufted hair and implies a common origin hypothesis (1). Alongside Australians, Papuans, Melanesians, and Dravidian-speaking Indian populations, the “Negrito” have been hypothesized to be isolated, “relic” descendants of a first dispersal out of Africa and into Asia (2). Following a biogeographical approach, the designation of “relic” is in reference to the ecological context of populations that have become isolated as a result of occupying geographical refugia or exploiting specific ecological niches. To date, the most comprehensive genetic study exploring diversity of modern human populations in Asia sampled seven “Negrito” populations, including the Agta, Aeta, and Iraya from the northern Philippines; the Mamanwa and Ati from the southern Philippines; and the Jehai and Kensiu from Malaysia (3). This study found that “Negrito” population affinities are with geographically proximate populations rather than with other “Negrito” groups. The study therefore challenges a simple common origin hypothesis for the “Negrito” and implies other evolutionary mechanisms accounting for their common phenotype. Nonetheless, the Mamanwa’s ancient association with Australians and highland Melanesians has been interpreted as evidence for an early, southern route dispersal into Southeast Asia (4). Likewise, the Aeta remain candidate descendants of a first dispersal within the multiple dispersals with isolation (MDI) model, alongside Melanesians and Papuans (5).

To assess affinities of our Aeta/Agta sample, as well as our Papuan and Melanesian samples, we conducted a principal component analysis (PCA) using the SNPRelate R package (6) and a discriminant analysis of principal components (DAPC) using the adegenet R package (7). We used the same data and groupings as in the main text (3, 4, 8–13) (Table 1 and Table S3). DAPC is a multivariate method, free of assumptions about Hardy–Weinberg equilibrium or linkage disequilibrium. It has been shown to generally perform better than the STRUCTURE method (14) and is also analogous to an ADMIXTURE method (15) in that a number,  $K$ , of clusters can be specified to assess population structure. We identified the best supported grouping of individuals running a  $K$ -means clustering of principal components (16) and used a Bayesian Information Criterion (BIC) approach to assess the best supported number of clusters. For the genetic dataset, we found  $K = 5$  to be the best supported model (Fig. S2A) and therefore used this in the DAPC. Although results were less clear for the cranial phenotype dataset, with BIC results approximately equivalent for  $K = 5$ –8 clusters (Fig. S2B), we also used  $K = 5$  as

the best-supported model. For the genetic dataset, the DAPC along the first two axes revealed three major clusters within the five supported by the  $K = 5$  model (Fig. S3A). They included (i) AU-NG-ME, (ii) ((JP-NE)-CA-(NI-SI)), and (iii) EA-SA. This clustering pattern is also observed along the first two PCs in a standard PCA (Fig. S3B). The Aeta/Agta were not classified into the AU-NG-ME cluster (Table S5), as might be expected if they shared an ancient association with those populations in a similar fashion as the Mamanwa. Instead, the Aeta/Agta classified primarily with the Japanese and Central Asians. As foreseen by the BIC results of the cranial phenotype data, classification was much more mixed in this case, with individuals classified across less coherent clusters (Table S5). Nevertheless, in the clusters where the Aeta/Agta were classified the most, Japanese and Central Asians were also strongly represented.

To more robustly assess the association of our Aeta/Agta sample, we conducted a TreeMix analysis (17) on the genetic data. The TreeMix method relaxes the assumptions of branching models of biological evolution, incorporating the possibility that populations did not remain isolated after their separation. Accordingly, evolutionary trees are constructed considering the possibility of gene flow between populations after their split. A maximum-likelihood tree was initially inferred from allele frequencies, with migration events added to populations that showed a poor fit to this tree. We modeled several scenarios allowing a number of migration events from 0 to 10, until (i) 99% of the variance in relatedness was explained and (ii) further migration events did not significantly increase the variance explained by the model. The trees were forced to have a root in Africa. Interestingly, the topography of the maximum-likelihood tree places the Aeta/Agta in a branch with Australians, Papuans, and Melanesians (Fig. S4A). It also reveals a strong likelihood of admixture between Japanese (JP) and Aeta/Agta (NE), with an inferred migration from the former to the latter.

Following these exploratory analyses, we placed Papuans and Melanesians as descendants of the first dispersal and Aeta/Aeta as descendants of the second dispersal for the MDI model. Because we grouped the Aeta and Agta as one population, our results are not directly comparable to those of ref. 5. However, we similarly interpret these analyses to suggest that the Aeta/Agta might have descended from an early southern route dispersal but have been strongly admixed with a subsequent dispersal. Because living Aeta/Agta speak an Austric language and given the inferred migration from Japan, such admixture might largely be consequent of the Holocene Austronesian expansion of mainland Asian populations into the Pacific (1).

1. Endicott P (2013) Revisiting the “negrito” hypothesis: A transdisciplinary approach to human prehistory in southeast Asia. *Hum Biol* 85(1–3):7–20.
2. Mirazón Lahr M (1996) *The Evolution of Modern Human Diversity: A Study of Cranial Variation* (Cambridge Univ Press, Cambridge, UK).
3. Abdulla MA, et al.; HUGO Pan-Asian SNP Consortium; Indian Genome Variation Consortium (2009) Mapping human genetic diversity in Asia. *Science* 326(5959):1541–1545.
4. Pugach I, Delfin F, Gunnarsdóttir E, Kayser M, Stoneking M (2013) Genome-wide data substantiate Holocene gene flow from India to Australia. *Proc Natl Acad Sci USA* 110(5):1803–1808.
5. Rasmussen M, et al. (2011) An Aboriginal Australian genome reveals separate human dispersals into Asia. *Science* 334(6052):94–98.
6. Zheng X, et al. (2012) A high-performance computing toolset for relatedness and principal component analysis of SNP data. *Bioinformatics* 28(24):3326–3328.
7. Jombart T, Devillard S, Balloux F (2010) Discriminant analysis of principal components: A new method for the analysis of genetically structured populations. *BMC Genet* 11(1):94.
8. Cavalli-Sforza LL (2005) The Human Genome Diversity Project: Past, present and future. *Nat Rev Genet* 6(4):333–340.
9. Reich D, Thangaraj K, Patterson N, Price AL, Singh L (2009) Reconstructing Indian population history. *Nature* 461(7263):489–494.
10. Xing J, et al. (2010) Toward a more uniform sampling of human genetic diversity: A survey of worldwide populations by high-density genotyping. *Genomics* 96(4):199–210.
11. Xing J, et al. (2009) Fine-scaled human genetic structure revealed by SNP microarrays. *Genome Res* 19(5):815–825.
12. Bryc K, et al. (2010) Genome-wide patterns of population structure and admixture in West Africans and African Americans. *Proc Natl Acad Sci USA* 107(2):786–791.
13. Reich D, et al. (2011) Denisova admixture and the first modern human dispersals into Southeast Asia and Oceania. *Am J Hum Genet* 89(4):516–528.
14. Pritchard JK, Stephens M, Donnelly P (2000) Inference of population structure using multilocus genotype data. *Genetics* 155(2):945–959.
15. Alexander DH, Novembre J, Lange K (2009) Fast model-based estimation of ancestry in unrelated individuals. *Genome Res* 19(9):1655–1664.
16. Liu N, Zhao H (2006) A non-parametric approach to population structure inference using multilocus genotypes. *Hum Genomics* 2(6):353–364.
17. Pickrell JK, Pritchard JK (2012) Inference of population splits and mixtures from genome-wide allele frequency data. *PLoS Genet* 8(11):e1002967.





**Table S2. Effective population size ( $N_e$ )**

| Population | $N_e$  |
|------------|--------|
| AU         | 4,784  |
| CA         | 6,057  |
| EA         | 12,167 |
| JP         | 5,692  |
| ME         | 3,626  |
| NE         | 2,304  |
| NG         | 2,462  |
| NI         | 8,464  |
| SA         | 13,174 |
| SI         | 5,824  |

**Table S3. Genetic and cranial samples**

| Population | Cranial subpopulations                                                                     | Genetic subpopulations                                                                                            | Language family*           | Genetic data (refs.) |
|------------|--------------------------------------------------------------------------------------------|-------------------------------------------------------------------------------------------------------------------|----------------------------|----------------------|
| AU         | Australian                                                                                 | Australian                                                                                                        | Australian                 | 4                    |
| CA         | Uyghur, Dungan, Kalmyk, Tarantchi                                                          | Uyghur, Kyrgystani                                                                                                | Eurasiatic, Dene-Caucasian | 3, 8, 10             |
| EA         | Amhara, Karo, Habesha, Bouma, Glaba, Turkana, Igai, Koukou, Afar-Danakil, Nyangatom, Pouma | Alur, Bulala, Kaba, Mada, Hausa                                                                                   | Nilo-Saharan, Afro-Asiatic | 10–12                |
| JP         | Japanese                                                                                   | Japanese                                                                                                          | Eurasiatic                 | 3, 8, 10, 11         |
| ME         | Solomon and Vanuatu Islanders                                                              | Papua New Guinea highlands                                                                                        | Indo-Pacific               | 4, 8, 13             |
| NE         | Agta, Aeta                                                                                 | Aeta, Agta                                                                                                        | Austriac                   | 3                    |
| NG         | Papua New Guinea, Torres Strait Islanders                                                  | Papua New Guinea “lowlands” (Bougainville)                                                                        | Indo-Pacific               | 3, 8                 |
| NI         | Bengali                                                                                    | Kashmiri Pandit, Vaish, Srivastava, Sahariya, Lodi, Satnami, Bhil, Tharu, Meghawal                                | Indo-European              | 4, 9                 |
| SA         | Xhosa, Khoi, Nama, San, Sotho, Malabar, Zulu, Tswana                                       | San, Bantu, !Kung, Pedi, Dogon, Bambara, Nguni, Sotho/Twana, Mbuti Pygmy, Hema, Luhya, Bamoun, Fang, Kongo, Xhosa | Khoisan, Niger-Kordofanian | 10–12                |
| SI         | Maravar, Tamil                                                                             | Vysya, Naidu, Velama, Kamsali, Chenchu, Kurumba, Hallaki, Dalit, Mala, Madiga, Irula                              | Dravidian                  | 3, 4, 9–11           |

\*Language families as defined by J. Greenberg (8).

**Table S4. Geographical waypoints used in dispersal models**

| Waypoints* | Geographic coordinates |           |
|------------|------------------------|-----------|
|            | Latitude               | Longitude |
| Bangkok    | 13.73                  | 100.52    |
| Cairo      | 30.06                  | 31.24     |
| Chennai    | 13.06                  | 80.24     |
| Colombo    | 6.93                   | 79.86     |
| Dhaka      | 23.71                  | 90.41     |
| Dubai      | 25.27                  | 55.31     |
| Jakarta    | –6.21                  | 106.84    |
| Karachi    | 24.89                  | 67.03     |

\*Locations correspond to Fig. 1 of the main text.

**Table S5. DAPC classification**

| Population | DAPC cluster |           |           |           |            |           |          |           |           |           |
|------------|--------------|-----------|-----------|-----------|------------|-----------|----------|-----------|-----------|-----------|
|            | 1            |           | 2         |           | 3          |           | 4        |           | 5         |           |
|            | Genetics     | Phenotype | Genetics  | Phenotype | Genetics   | Phenotype | Genetics | Phenotype | Genetics  | Phenotype |
| AU         | 0            | 1 (5%)    | 12 (100%) | 11 (55%)  | 0          | 6 (30%)   | 0        | 0         | 0         | 2 (10%)   |
| CA         | 25 (45%)     | 7 (28%)   | 0         | 2 (8%)    | 31 (55%)   | 10 (40%)  | 0        | 3 (12%)   | 0         | 3 (12%)   |
| EA         | 0            | 1 (4%)    | 0         | 2 (8%)    | 0          | 3 (12%)   | 0        | 7 (28%)   | 66 (100%) | 12 (48%)  |
| JP         | 107 (100%)   | 12 (39%)  | 0         | 4 (13%)   | 0          | 8 (26%)   | 0        | 5 (16%)   | 0         | 2 (6%)    |
| ME         | 0            | 0         | 30 (100%) | 3 (18%)   | 0          | 2 (12%)   | 0        | 8 (47%)   | 0         | 4 (23%)   |
| NE         | 15 (94%)     | 9 (39%)   | 0         | 0         | 1 (6%)     | 13 (56%)  | 0        | 0         | 0         | 1 (4%)    |
| NG         | 0            | 4 (13%)   | 10 (100%) | 15 (48%)  | 0          | 4 (13%)   | 0        | 5 (16%)   | 0         | 3 (10%)   |
| NI         | 0            | 5 (33%)   | 0         | 1 (7%)    | 61 (100%)  | 3 (20%)   | 0        | 3 (20%)   | 0         | 3 (20%)   |
| SA         | 0            | 1 (5%)    | 0         | 2 (10%)   | 0          | 6 (30%)   | 41 (19%) | 1 (5%)    | 174 (81%) | 10 (50%)  |
| SI         | 0            | 10 (38%)  | 0         | 0         | 141 (100%) | 3 (12%)   | 0        | 8 (31%)   | 0         | 5 (19%)   |

Classification number and rate (in parentheses, approximate percent of total).

## Other Supporting Information Files

[Dataset S1 \(XLSX\)](#)
